# Supplementary material for: Iterative reconstruction and individualized automatic tube current selection reduce radiation dose while maintaining image quality in 320-multidetector computed tomography coronary angiography
Source: PubMed Central journal article supplement — Clin Radiol. 2013 Nov;68(11):e570–7. doi: 10.1016/j.crad.2013.05.098 (PMC3807656; doi:10.1016/j.crad.2013.05.098), 2013-11
Supplement: mmc1.pdf [file mmc1.pdf]

## Supplementary table

**Table i: Post-hoc analysis of 200 patents from each group matched for gender, body mass index and acquisition window.**

|                                          | Group 1<br>(QDS+) | Group 2<br>(AIDR)        | Group 3<br>(AIDR3D and<br>SUREexposure) | P                        |                  |
|------------------------------------------|-------------------|--------------------------|-----------------------------------------|--------------------------|------------------|
| N                                        | 200               | 200                      | 200                                     | -                        |                  |
| Male                                     | 44.5%             | 44.5%                    | 44.5%                                   | <0.001                   |                  |
| Age (years)                              | 58<br>(56, 59)    | 57<br>(56, 59)           | 59<br>(57, 60)                          | 0.565                    |                  |
| Heart rate (/min)                        | 59<br>(58, 61)    | 59<br>(57, 60)           | 58<br>(57, 59)                          | 0.479                    |                  |
| Body mass index<br>(kg/m <sup>2</sup> )  | 28<br>(27, 29)    | 28<br>(28, 29)           | 28<br>(27, 29)                          | 0.912                    |                  |
| Acquisition window<br>(30-80% vs 70-80%) | 28 / 172          | 28 / 172                 | 28 / 172                                | <0.001                   |                  |
| Scan range (mm)                          | 128               | 128                      | 128                                     | <0.001                   |                  |
| Contrast (mL)                            | 55<br>(54, 56)    | 54<br>(53, 54)           | 53<br>(52, 54)                          | 0.064                    |                  |
| Tube voltage (kV)                        | 100<br>120<br>135 | 39%<br>58%<br>3%         | 43%<br>53%<br>4%                        | 69%<br>31%<br>0%         | <0.001           |
| Tube current (mA)                        | 100 kV<br>120 kV  | 538<br>536<br>(531, 541) | 447<br>426<br>(421, 430)                | 331<br>397<br>(362, 431) | <0.001<br><0.001 |
| Subjective image quality                 | 1.3<br>(1.2, 1.4) | 1.1<br>(1.1, 1.2) *      | 1.1<br>(1.1, 1.2) *                     | <0.001                   |                  |
| Aorta attenuation (HU)                   | 430<br>(415, 443) | 423<br>(411, 436)        | 533<br>(517, 549) * §                   | <0.001                   |                  |
| Liver attenuation (HU)                   | 65<br>(62, 67)    | 62<br>(60, 64)           | 60<br>(58, 62) *                        | 0.01                     |                  |
| IVS attenuation (HU)                     | 88<br>(85, 92)    | 85<br>(83, 88)           | 88<br>(85, 90)                          | 0.23                     |                  |
| Image noise aorta (HU)                   | 31<br>(30, 32)    | 31<br>(30, 32)           | 40<br>(39, 41) * §                      | <0.001                   |                  |
| Image noise liver (HU)                   | 39<br>(38, 41)    | 38<br>(37, 40)           | 39<br>(38, 40)                          | 0.534                    |                  |
| Image noise IVS (HU)                     | 34<br>(32, 35)    | 32<br>(31, 33) *         | 37<br>(36, 38) * §                      | <0.001                   |                  |
| Contrast-to-noise ratio                  | 12<br>(12, 13)    | 12<br>(12, 13)           | 12<br>(12, 13)                          | 0.747                    |                  |
| Contrast-to-myocardium ratio             | 12<br>(11, 12)    | 12<br>(11, 12)           | 11<br>(11, 12)                          | 0.823                    |                  |
| DLP (mGy.cm)                             | 261<br>(246, 276) | 211<br>(199, 223) *      | 141<br>(129, 153) * §                   | <0.001                   |                  |

**Mean (95% confidence interval) or percentage (%).** (IVS, intraventricular septum; DLP, dose length product; HU, Hounsfield units)

\* P<0.05 compared to Group 1, § P<0.05 compared to Group 2
